ORIGINAL RESEARCH

# **Sleep quality mediates the relationship between risk of obstructive sleep apnea and acute stress in young adults**

Author name: Kunal Aggarwal<sup>1</sup>

Author name: Nasreen Akhtar<sup>2\*</sup>

Author name: Hrudananda Mallick<sup>3</sup>

<sup>1</sup>Author affiliations: MBBS student, All India institute of medical Sciences, New Delhi-110029, India

<sup>2</sup>Author affiliations: Associate Professor, Department of Physiology, All India institute of medical Sciences, New Delhi-110029, India

<sup>3</sup>Author affiliations: Professor, Department of Physiology, SGT University, Gurgaon, Haryana-122505, India

Contact details: Email: drnasreenakhtar@gmail.com

\*Correspondence: Nasreen Akhtar, Room no. 2024, Department of Physiology, AIIMS, New Delhi-110029, India

Tel +911126594053

Email : drnasreenakhtar@gmail.com

**Abstract:**

1 **Purpose:**

2 Intermittent hypoxia and transient arousals in obstructive sleep apnea (OSA) can lead to poor  
3 sleep quality and acute stress. Rising levels of obesity and increased incidence of OSA in young  
4 adults predisposes them to acute stress. We propose a mediation model to assess if risk of OSA  
5 is associated with acute stress and if the relationship between risk for OSA and acute stress is  
6 mediated by sleep quality.

7 **Methods:**

8 493 healthy individuals (F=237, M=256) from 18-25 years of age (mean age=20.3±1.53 years)  
9 were screened for OSA, sleep quality and acute stress using STOP-BANG questionnaire,  
10 Pittsburg Sleep Quality Index and American Psychiatry Association's National Stressful Events  
11 Survey Acute Stress Disorder Short Scale (NSESS-S) respectively. Binary and logistic regression  
12 were used establish the relationships between the variables. Sobel test for mediation analysis  
13 was conducted.

14 **Results:**

15 73 participants (17.3%) were found at an intermediate and high risk of OSA by STOP BANG  
16 questionnaire. 79 (16%) participants reported level of stress as 'None'. Mild, moderate and  
17 severe stress was present in 248 (50.3%), 109 (22.1%), 51 (10.3%) and 16 (3.2%) participants  
18 respectively. The odds of having severe and extreme stress among those at risk of sleep apnea  
19 is 2.18 times higher than that among those not at risk of sleep apnea (OR: 2.18, 95% Confidence  
20 Interval: 1.37-3.51). Sobel test established that the relationship between OSA and acute stress is  
21 mediated by sleep quality.

22 **Conclusion**

23 Sleep quality mediates the relationship between risk for sleep apnea and acute stress. This  
24 highlights the importance of screening for OSA in young adults, particularly young men with high  
25 BMI, presenting with high stress levels.

26 **Keywords:** Emotional stress, sleep apnea, sleep quality, logistic regression, mediation analysis

## 27 Introduction

28 Obstructive sleep apnea (OSA) is characterized by repeated upper airway obstruction causing  
29 oxygen desaturation and frequent arousals from sleep[1]. The prevalence of OSA is increasing  
30 worldwide. A study from India reported a prevalence of 13.74% of OSA in general population[2].  
31 The frequent desaturations, electroencephographic microarousals and sleep fragmentation in  
32 OSA lead to cardiovascular and neuropsychiatric sequelae [3]. OSA has an effect on intellectual  
33 abilities related mainly to verbal ability, attention and learning skills including planning and object  
34 categorisation [3]. These represent an organic damage to the central nervous system. The  
35 awareness of these intellectual impairments, sleep fragmentation and reduced daytime alertness  
36 makes the patients feel restless, anxious or depressed [4,5]. This can manifest emotionally as  
37 stress. Frequent arousals also cause an increase in catecholamines and cortisol levels,  
38 exacerbating the stress. Emotional stress has been found to be higher in patients of OSA and  
39 reduces after treatment [6]. OSA has been linked to quality of life [7], <sup>7</sup> depression, <sup>8</sup> and anxiety,  
40 <sup>9</sup> but the association with acute stress has been reported by very few studies. <sup>6,10</sup> Most of the  
41 studies on OSA have collected data from moderate to severe sleep apnea in older patients and in  
42 clinical settings. Occurrence of OSA in general population, particularly among young adults, has  
43 been neglected. Young adults are a vulnerable population for higher emotional stress. The  
44 current study was conducted in young adults in general population with the objectives to  
45 investigate the association of between risk of OSA and acute stress levels and to assess if the  
46 association between risk of OSA and acute stress level is mediated by sleep quality.

47

## 48 **Material and methods**

### 49 ***Sample and data Collection***

50 This data is obtained from a study conducted in undergraduate college students from various  
51 courses in New Delhi from July to September 2019. <sup>11</sup> Ethical clearance was obtained from  
52 Institutional Ethical Committee of All India Institute of Medical Sciences, New Delhi (No IECPG-  
53 343/29.05.2019 dated 03.07.2019). The primary objective of the study was to investigate the  
54 association between acute stress and risk for obstructive sleep apnea in young adults.

55 This was a cross-sectional and observational study. There was no control group or blinding of  
56 assessors. Participants were approached by advertising in college social media groups and  
57 announcements in classrooms. The complete information regarding the study and consent form  
58 were provided online. All participants gave informed consent for the study and filled the online  
59 questionnaire. The questionnaire collected information about the student's age, gender, height,  
60 weight, acute stress, risk for sleep apnea and sleep quality. 503 participants between the ages of  
61 18 and 25 years consented for the study. Those who were previously diagnosed for or on  
62 treatment for sleep disorders, psychiatric disorders or any other chronic disease were excluded.

63

### 64 ***Measures***

65 Risk of sleep apnea was assessed by using STOP-BANG questionnaire (SBQ). <sup>12</sup> Even though  
66 Berlin questionnaire is the one most used in assessments in the clinic, SBQ is the more accurate  
67 tool for assessing risk of OSA in the general population. <sup>13</sup> There were 8-items in the  
68 questionnaire. Each positive item was scored as one. The risk was marked low, intermediate and  
69 high for a score of 0-2, 3-4 and 5-8 respectively. Intermediate and high risk categories were  
70 clubbed into one category for the purpose of analysis in this study as the number of participants  
71 in high risk category were very few and would skew the analysis.

72 Sleep quality was assessed by using Pittsburg Sleep Quality Index. <sup>14</sup> It is a 9-item questionnaire  
73 widely used for assessing sleep quality. A score of less than or equal to five was considered good  
74 quality sleep, and a score of more than five was considered as poor-quality sleep. Sleep time was  
75 distinguished from other activities after going to bed like listening to music or reading books.  
76 Acute stress was assessed by American Psychiatry Association Severity of Acute Stress  
77 Symptoms—Adult (National Stressful Events Survey Acute Stress Disorder Short Scale  
78 [NSESSS]) questionnaire. <sup>15</sup> It was a 7-item questionnaire. Each item on the measure was rated  
79 by the subject on a 5-point scale (0=Not at all; 1=A little bit; 2=Moderately; 3=quite a bit, and  
80 4=Extremely). The total raw score ranged from 0 to 28 and a higher score indicated a higher  
81 degree of acute stress. This score was divided by 7 (the number of items) to provide a total  
82 average score which was allocated a 5-point scale. It was used to assess severity of acute stress  
83 as none (0), mild (1), moderate (2), severe (3) and extreme (4). <sup>15</sup>

## 84 **Analysis**

85 Acute stress, sleep quality and risk for obstructive sleep apnea were correlated to each other  
86 using Pearson's bivariate correlation analysis. The Statistical Package for the Social Sciences  
87 (SPSS®) software version 25.0 (IBM, Armonk NY, USA) for Windows® was used for the  
88 correlation analyses. To investigate if risk for sleep apnea is associated with acute stress and if  
89 sleep quality mediates the relationship between sleep apnea and acute stress, we created a  
90 mediation model (Figure 1). A simple mediation analysis was performed based on the method  
91 described by Baron and Kenny. <sup>16</sup> The dependent (outcome) variable for analysis was acute  
92 stress. The independent variable was risk for obstructive sleep apnea. Mediator variable was  
93 sleep quality. In our model, we assume there are two causal paths to the dependent variable  
94 (acute stress), the direct impact of risk of OSA (path c) and the impact of sleep quality as the  
95 mediator (path a and b). The mediated path from independent variable (Risk of OSA) to the  
96 dependant variable (acute stress) is path c'. Binary and ordinal logistic regression were  
97 performed using R software (R Core Team 2014 v3.4.4). Mediation analysis was performed using  
98 Sobel test. <sup>17</sup> Sobel test is an accepted test of indirect effect and mediation. <sup>18</sup>

## 99 Results

100 503 volunteers filled up the questionnaire. After applying inclusion and exclusion criteria, 493  
101 were included for data analysis. Female: male ratio was 0.91 (Females= 237, Males = 256).  
102 Mean age of participants was  $20.3 \pm 1.53$  years, ranging from 18 to 25 years. The basic  
103 descriptives of the study participants are depicted in Table 1. 73 participants (17.3%) were found  
104 at an intermediate and high risk of OSA. 79 (16%) participants reported level of stress as 'None'.  
105 The prevalence of mild, moderate and severe stress was 248 (50.3%), 109 (22.1%), 51 (10.3%)  
106 and 16 (3.2%) respectively. Mild stress was found higher in males (males- 27.2%, females-  
107 23.1%), whereas moderate, severe and extreme stress was higher in females (Table 1).

108

109 **Correlation analysis:** Acute stress was significantly correlated with sleep quality ( $r=0.328$ ,  
110  $p<0.001$ ), and risk for OSA ( $r=0.160$ ,  $p<0.001$ ) (Table 2). Sleep quality also correlates with risk of  
111 OSA ( $r=0.150$ ,  $p<0.001$ ).

112

113 **Logistic Regression and mediation analysis:** The assumptions of regression were checked  
114 and found satisfactory. First, using steps described by Baron and Kenny, <sup>16</sup> using acute stress as  
115 the dependant variable and risk for obstructive apnea as the independent variable, ordinal logistic  
116 regression was applied and risk for obstructive apnea was shown to be a significant predictor  
117 ( $p<0.001$ ) of acute stress for all levels of stress (none, mild, moderate, severe and extreme) (c  
118 pathway). The odds of having severe and extreme stress among those among those at risk of  
119 sleep apnea is 2.18 times higher than that among those not at risk of sleep apnea (OR: 2.18,  
120 95% Confidence Interval: 1.37-3.51). Second, risk for sleep apnea was used to predict the  
121 mediator variable of sleep quality (a pathway) using binary logistic regression. The odds ratio of  
122 poor sleep quality was 2.3 times in a person at high risk of OSA compared to a participant at low  
123 risk of OSA (OR: 2.3, 95% Confidence interval: 1.40-3.83). Third, the relationship between the  
124 mediator sleep quality and acute stress was established using ordinal logistic regression (b  
125 pathway). On change in sleep quality from good to poor, the odds of mild stress vs moderate or

126 severe combined are 3.5 times greater (OR: 3.55, 95% Confidence interval: 2.48-5.11). Last, the  
127 mediated relationship between SBQ and acute stress was examined for a reduction in prediction  
128 when the mediator was added to the model (c' pathway). Based on a previous study,<sup>19</sup> the three  
129 regression equations were used to test the mediation effects of SQ on relation between OSA and  
130 acute stress. Utilizing the coefficients of pathways 'a' and 'b', and Standard Errors (S<sub>a</sub>, S<sub>b</sub>) of  
131 these coefficients, mediation was found (Test statistic: 0.7255; p-value 0.049, using Sobel test),  
132 [8]<sup>7</sup> showing that the relationship between SB and acute stress was no longer significant after  
133 controlling for sleep quality. The Sobel test was used to determine that the 'ab' effect was  
134 significantly greater than zero. This provides evidence that the relationship between OSA and  
135 acute stress is mediated by sleep quality.

## 136 Discussion

137 Recurring upper-airway obstruction, intermittent hypoxemia and transient arousals leading to  
138 sleep fragmentation and poor sleep quality, are the hall marks of OSA. The risk factors for OSA  
139 are male sex, obesity, and advancing age, among others.<sup>6</sup>  
140 Rate of weight gain is greatest in young adults, averaging 1 to 2 pounds per year.<sup>20</sup> Up to 19% of  
141 teenagers and young adults are reportedly obese in India.<sup>21</sup> Rising levels of obesity are  
142 increasing the prevalence of OSA in young adults. The role of OSA in development of stress in  
143 young adults has not been studied much. When presenting with acute stress, young adults are  
144 seldom screened for OSA. In this study, our aim is to highlight the importance of screening for  
145 OSA in young adults, particularly young men with high BMI, presenting with high stress levels.  
146 SBQ has been recommended as the screening tool for OSA in community settings and where  
147 PSG is not available.<sup>13</sup> It is more accurate than Berlin and STOP questionnaire for screening of  
148 OSA in general population.<sup>13,22</sup> SBQ has a reported sensitivity of 88,90 and 93%, specificity of  
149 42,36 and 35%, and a diagnostic odds ratio of 5.13, 5.05 and 6.51 for mild, moderate and severe  
150 OSA, respectively.<sup>13</sup> We found a prevalence of intermediate and high risk of sleep apnea to be  
151 14.8% in our study. It is similar to the prevalence rate of 13.7% reported by a previous study  
152 conducted in Delhi.<sup>2</sup> We have found a significant association of risk of OSA with acute stress. We

153 presented the result in World Sleep Congress 2019.<sup>23</sup> The risk of being under severe acute  
154 stress was 2.18 times higher in those at risk of OSA than those without the risk of OSA. Other  
155 studies have evaluated the association of OSA with emotional stress. Das Santos et al have  
156 reported a higher stress level in moderate and severe apnea patients, which reduced significantly  
157 after receiving medical or surgical treatment.<sup>6</sup> Frequent arousals during the night in OSA alter the  
158 activity of hypothalamic-pituitary-adrenal axis. Repeated and reversible airway obstruction lead to  
159 intermittent hypoxia, sleep fragmentation and decreased sleep duration, causing cortisol and  
160 catecholamine release.<sup>24–27</sup> Cortisol release is associated with higher levels of stress.<sup>28</sup> This  
161 may be contributing to acute stress development in patients of OSA.

162 Second, we assessed if risk for OSA predicts the quality of sleep. As expected, we found higher  
163 odds of poor-quality sleep in those at high risk of OSA as compared to those at low risk of OSA.  
164 Poor quality of sleep is one the major symptoms of OSA and causes excessive daytime  
165 sleepiness and fatigue.<sup>1</sup> Quality of sleep is closely related to number and extent of arousals.  
166 Frequent arousals are a hallmark of OSA.<sup>1,9</sup>

167 Third, we assessed if sleep quality can predict acute stress. Using ordinal logistic regression, we  
168 found that poor sleep quality leads to 3.5 times higher chance of having moderate/ severe acute  
169 stress. Some other studies have found that increased perceived stress and sleep quality are  
170 associated with each other.<sup>29,30</sup> Doane and Thurston found that lower sleep efficiency predicted  
171 higher next day stress in adolescents.<sup>31</sup> A few studies have examined the directionality of the  
172 relation between stress and sleep and found it to be bidirectional.<sup>27,31</sup> Sleep quality affects the  
173 quality of replenishment of cognitive processes and energy level.<sup>32</sup> Experimentally produced  
174 sleep restriction or sleep loss produces performance decline the next day.<sup>32,33</sup> Our study is  
175 unable to comment on causality or directionality of effect due to a cross-sectional design. The  
176 importance of our study lies in relating the sleep quality in everyday settings of the participants to  
177 acute stress.

178 Mediation analysis proves our hypothesis that poor sleep quality mediates the relationship  
179 between OSA and acute emotional stress. Repeated inspiratory airway occlusion in OSA leads to  
180 multiple stressors. The stressors may be frequent episodes of hypoxemia of varying duration and



181 severity, disrupted sleep due to frequent arousals, reduced total sleep time, and strenuous  
182 respiratory efforts resulting in the generation of severe negative intrathoracic pressures.<sup>35</sup> The  
183 neuro-hormonal, vascular and endocrine responses to OSA include excessive sympathetic  
184 activation which may carry over to the daytime awake state.<sup>36</sup> The powerful sympathetic  
185 excitatory effects may cause increased glucocorticoids and catecholamines and translate into  
186 acute stress.<sup>37</sup>

187 One of the limitations of our study is the inability to establish the diagnosis of OSA with  
188 polysomnography. Further studies using polysomnography for diagnosis of OSA with objective  
189 measures of stress such as cortisol levels are required to confirm the findings. Secondly, the  
190 duration and onset of acute stress and OSA cannot be determined due to cross sectional design,  
191 and hence the temporal association of acute stress with OSA cannot be established.

192 Based on the findings of our study, we recommend screening for OSA in young adults presenting  
193 with acute stress, particularly in overweight males. Further studies using polysomnography for  
194 confirmatory diagnosis of OSA and a longitudinal design are recommended to establish causality.

195

## 196 **Conclusion**

197 Increased risk to obstructive sleep apnea among young adults is associated with acute stress,  
198 and the relationship is mediated by sleep quality.

## 199 **Acknowledgments**

200 We would like to acknowledge the Indian Council of Medical Research. This study was conducted  
201 under the Short-Term Studentship Award (STS-2019) conferred by the Indian Council of Medical  
202 Research.

## 203 **Disclosure**

204 The authors report no conflicts of interest in this work.

205 The abstract of this paper was presented at the 15<sup>th</sup> World Sleep Congress 2019, September 21-  
206 25, at Vancouver, Canada as a poster presentation with interim findings. The poster's abstract  
207 was published in "Poster Abstracts" in the journal 'Sleep medicine' and is available at  
208 <https://www.sciencedirect.com/journal/sleep-medicine/vol/64/suppl/S1>.

## 209 **References**

- 210 1. Sleep-related breathing disorders in adults: recommendations for syndrome definition and  
211 measurement techniques in clinical research. The Report of an American Academy of  
212 Sleep Medicine Task Force. *Sleep*. 1999;22(5):667-689.
- 213 2. Sharma SK, Kumpawat S, Banga A, Goel A. Prevalence and risk factors of obstructive  
214 sleep apnea syndrome in a population of Delhi, India. *Chest*. 2006;130(1):149-156.
- 215 3. Al-Barrak M, Shepertycky MR, Kryger MH. Morbidity and mortality in obstructive sleep  
216 apnea syndrome 2: Effect of treatment on neuropsychiatric morbidity and quality of life.  
217 *Sleep Biol Rhythms*. 2003;1(2):65-74.
- 218 4. Millman RP, Fogel BS, McNamara ME, Carlisle CC. Depression as a manifestation of  
219 obstructive sleep apnea: reversal with nasal continuous positive airway pressure. *J Clin*  
220 *Psychiatry*. 1989;50(9):348-351.
- 221 5. Sforza E, Roche F. Sleep Apnea Syndrome and Cognition. *Front Neurol*. 2012;3:87.
- 222 6. Santos MAG dos, Nakano T de C, Mendes FA, Duarte BB, Marone SAM. Emotional Stress  
223 Evaluation of Patients with Moderate and Severe Sleep Apnea Syndrome. *Int Arch*  
224 *Otorhinolaryngol*. 2017;21(1):28-32.
- 225 7. Baldwin CM, Griffith KA, Nieto FJ, O'Connor GT, Walsleben JA, Redline S. The association  
226 of sleep-disordered breathing and sleep symptoms with quality of life in the Sleep Heart  
227 Health Study. *Sleep*. 2001;24(1):96-105.
- 228 8. Reynolds CF 3rd, Kupfer DJ, McEachran AB, Taska LS, Sewitch DE, Coble PA.  
229 Depressive psychopathology in male sleep apneics. *J Clin Psychiatry*. 1984 Jul;45(7):287-  
230 90.
- 231 9. Macey PM, Woo MA, Kumar R, Cross RL, Harper RM. Relationship between Obstructive

- 232 Sleep Apnea Severity and Sleep, Depression and Anxiety Symptoms in Newly-Diagnosed  
233 Patients. *PLoS ONE*. 2010;5(4).
- 234 10. Chiang JJ, Bower JE, Irwin MR, Taylor SE, Fuligni AJ. Adiposity moderates links from early  
235 adversity and depressive symptoms to inflammatory reactivity to acute stress during late  
236 adolescence. *Brain Behav Immun*. 2017;66:146-155.
- 237 11. Aggarwal K, Akhtar N, Mallick H. Social jet lag, screen time, physical activity and sleep  
238 quality in Indian young adults. *Sleep Med*. 2019;64:S3-S4.
- 239 12. Chung F, Subramanyam R, Liao P, Sasaki E, Shapiro C, Sun Y. High STOP-Bang score  
240 indicates a high probability of obstructive sleep apnoea. *BJA Br J Anaesth*.  
241 2012;108(5):768-775.
- 242 13. Chiu H-Y, Chen P-Y, Chuang L-P, et al. Diagnostic accuracy of the Berlin questionnaire,  
243 STOP-BANG, STOP, and Epworth sleepiness scale in detecting obstructive sleep apnea:  
244 A bivariate meta-analysis. *Sleep Med Rev*. 2017;36:57-70.
- 245 14. Buysse DJ, Reynolds CF, Monk TH, Berman SR, Kupfer DJ. The Pittsburgh Sleep Quality  
246 Index: a new instrument for psychiatric practice and research. *Psychiatry Res*.  
247 1989;28(2):193-213.
- 248 15. Kilpatrick, D. G., Resnick, H. S., & Friedman, M. J. (2013a). Severity of Acute Stress  
249 Symptoms—Adult (National Stressful Events Survey Acute Stress Disorder Short Scale  
250 [NSESSS]) [Measurement instrument].
- 251 16. Baron RM, Kenny DA. The moderator–mediator variable distinction in social psychological  
252 research: Conceptual, strategic, and statistical considerations. *J Pers Soc Psychol*.  
253 1986;51(6):1173-1182.
- 254 17. Preacher KJ and Leonardelli GJ. “Calculation for the Sobel Test: An Interactive Calculation  
255 Tool for Mediation Tests [Online software],” 2010. Available at:  
256 <http://quantpsy.org/sobel/sobel.htm>. Accessed on October 12, 2020.
- 257 18. Preacher KJ and Hayes AF. SPSS and SAS Procedures for Estimating Indirect Effects in  
258 Simple Mediation Models. *Behaviour Research Methods, Instruments, & Computers*. 2004  
259 (36):717-731.

- 260 19. Gangwisch JE, Malaspina D, Posner K, et al. Insomnia and Sleep Duration as Mediators of  
261 the Relationship Between Depression and Hypertension Incidence. *Am J Hypertens*.  
262 2010;23(1):62-69.
- 263 20. Wing RR, Tate D, Espeland M, et al. Weight gain prevention in young adults: design of the  
264 study of novel approaches to weight gain prevention (SNAP) randomized controlled trial.  
265 *BMC Public Health*. 2013;13(1):300.
- 266 21. Jayawardena R, Ranasinghe P, Wijayabandara M, Hills AP, Misra A. Nutrition Transition  
267 and Obesity Among Teenagers and Young Adults in South Asia. *Curr Diabetes Rev*.  
268 2017;13(5):444-451.
- 269 22. Nagappa M, Liao P, Wong J, et al. Validation of the STOP-Bang Questionnaire as a  
270 Screening Tool for Obstructive Sleep Apnea among Different Populations: A Systematic  
271 Review and Meta-Analysis. *PloS One*. 2015;10(12):e0143697.
- 272 23. Aggarwal K, Akhtar N, Mallick HN. High risk of sleep apnoea is associated with acute  
273 stress in young adults. *Sleep Med*. 2019;64:S7.
- 274 24. Miller JN, Berger AM. Screening and assessment for obstructive sleep apnea in primary  
275 care. *Sleep Med Rev*. 2016;29:41-51.
- 276 25. Bradley TD, Floras JS. Obstructive sleep apnoea and its cardiovascular consequences.  
277 *Lancet Lond Engl*. 2009;373(9657):82-93.
- 278 26. Young T, Finn L, Peppard PE, et al. Sleep Disordered Breathing and Mortality: Eighteen-  
279 Year Follow-up of the Wisconsin Sleep Cohort. *Sleep*. 2008;31(8):1071-1078.
- 280 27. Buckley TM, Schatzberg AF. On the interactions of the hypothalamic-pituitary-adrenal  
281 (HPA) axis and sleep: normal HPA axis activity and circadian rhythm, exemplary sleep  
282 disorders. *J Clin Endocrinol Metab*. 2005;90(5):3106-3114.
- 283 28. McEwen BS. Central effects of stress hormones in health and disease: understanding the  
284 protective and damaging effects of stress and stress mediators. *Eur J Pharmacol*.  
285 2008;583(2-3):174-185.
- 286 29. Doolin J, Vilches JE, Cooper C, Gipson C, Sorensen W. Perceived stress and worldview  
287 influence sleep quality in Bolivian and United States university students. *Sleep Health*.

- 288           2018;4(6):565-571.
- 289       30. Roskoden FC, Krüger J, Vogt LJ, et al. Physical Activity, Energy Expenditure, Nutritional  
290           Habits, Quality of Sleep and Stress Levels in Shift-Working Health Care Personnel. *PLoS*  
291           *One*. 2017;12(1):e0169983.
- 292       31. Doane LD, Thurston EC. Associations among sleep, daily experiences, and loneliness in  
293           adolescence: Evidence of moderating and bidirectional pathways. *J Adolesc*.  
294           2014;37(2):145-154.
- 295       32. Yap Y, Slavish DC, Taylor DJ, Bei B, Wiley JF. Bi-directional relations between stress and  
296           self-reported and actigraphy-assessed sleep: a daily intensive longitudinal study. *Sleep*.  
297           2020;43(3).
- 298       33. Pejovic S, Basta M, Vgontzas AN, et al. Effects of recovery sleep after one work week of  
299           mild sleep restriction on interleukin-6 and cortisol secretion and daytime sleepiness and  
300           performance. *Am J Physiol - Endocrinol Metab*. 2013;305(7):E890-E896.
- 301       34. Vgontzas AN, Tsigos C, Bixler EO, Stratakis CA, Zachman K, Kales A, Vela-Bueno A,  
302           Chrousos GP. Chronic insomnia and activity of the stress system: a preliminary study. *J*  
303           *Psychosom Res*. 1998 Jul;45(1):21-31.
- 304       35. Lopez-Jimenez F, Somers VK. Stress measures linking sleep apnea, hypertension and  
305           diabetes--AHI vs arousals vs hypoxemia. *Sleep*. 2006;29(6):743-744.
- 306       36. Somers VK, Dyken ME, Clary MP, Abboud FM. Sympathetic neural mechanisms in  
307           obstructive sleep apnea. *J Clin Invest*. 1995;96(4):1897-1904.
- 308       37. Elenkov IJ, Chrousos GP. Stress hormones, proinflammatory and antiinflammatory  
309           cytokines, and autoimmunity. *Ann N Y Acad Sci*. 2002;966:290-303.
- 310

311 **Table 1** Basic descriptives of the study participants

312

| S.No                              | Characteristic                     | Total<br>(n=493) | Male<br>(n=256) | Female<br>(n=237) |
|-----------------------------------|------------------------------------|------------------|-----------------|-------------------|
| 1                                 | Age (years) Mean ± SD              | 20.3±1.53        | 20.04±1.46      | 20.59±1.57        |
| 2                                 | BMI (Kg/m <sup>2</sup> ) Mean ± SD | 22.7±3.77        | 22.97±3.49      | 20.44±3.91        |
| 3 Acute stress                    |                                    |                  |                 |                   |
|                                   | None (0)                           | 69 (14%)         | 43 (8.7%)       | 26 (5.3%)         |
|                                   | Mild (1)                           | 248(50.3%)       | 134(27.2%)      | 114(23.1%)        |
|                                   | Moderate(2)                        | 109(22.1%)       | 49 (9.9%)       | 60(12.2%)         |
|                                   | Severe (3)                         | 51(10.3%)        | 25(5.1%)        | 26(5.3%)          |
|                                   | Extreme (4)                        | 16 (3.2%)        | 5 (1.0%)        | 11(2.2%)          |
| 5 Risk of Obstructive Sleep Apnea |                                    |                  |                 |                   |
|                                   | Low risk                           | 420 (85.2%)      | 192 (75%)       | 228 (96.2%)       |
|                                   | Intermediate + High risk           | 73 (14.8%)       | 64 (25%)        | 9 (3.7%)          |
| 6 Sleep quality (PSQI)            |                                    |                  |                 |                   |
|                                   | Good (Score 1-5)                   | 315 (63.9%)      | 173 (35.1%)     | 142 (28.8%)       |
|                                   | Poor (Score 5- 21)                 | 178 (36.1%)      | 83 (16.8%)      | 95 (19.3%)        |

313

314 **Notes:**

315 **Abbreviations:** SD, Standard Deviation, PSQI, Pittsburg Sleep Quality Index

316

317 Table 2: Correlation between acute stress, Sleep Quality and Risk of OSA

|              | Acute stress | Sleep quality | Risk of OSA |
|--------------|--------------|---------------|-------------|
| Acute stress | 1            | .328**        | .160**      |
| PSQI         |              | 1             | .150**      |
| SB           |              |               | 1           |

318

319 Abbreviations: OSA, Obstructive Sleep Apnea

320 **Figure 1** Mediation model

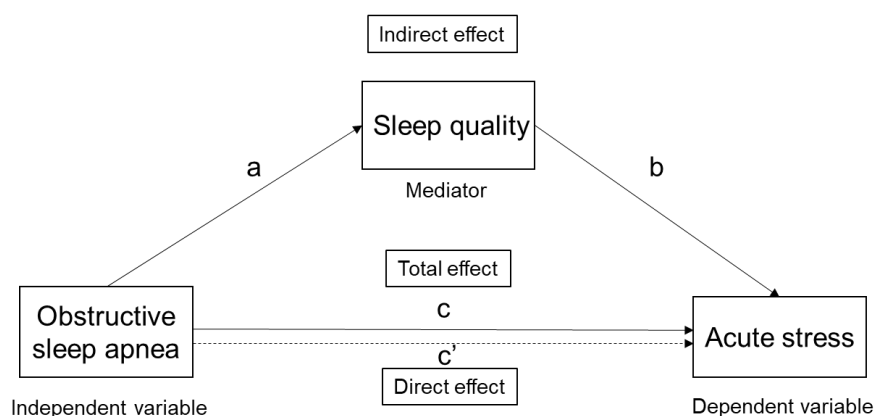

321

322

323 **Figure 2** Mediation model with effect size.

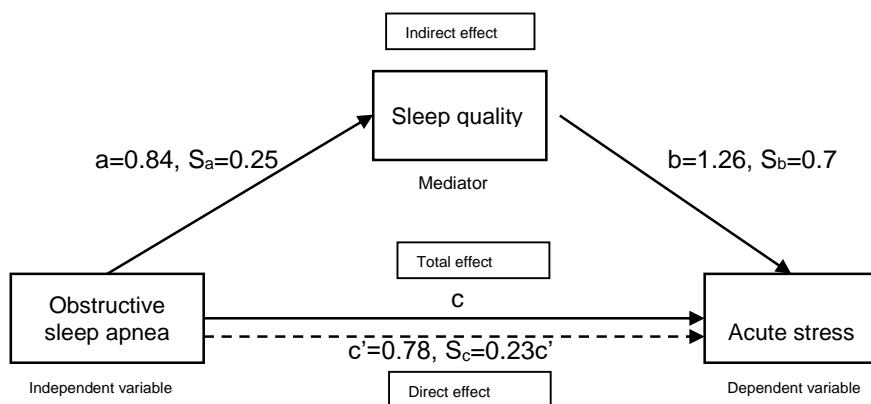

324

325 Legend: a, Regression coefficient of pathway 'a'; b, Regression coefficient of pathway 'b'; c, Regression  
 326 coefficient of pathway 'c'; Sa, Standard error of the coefficient 'a', Sb, Standard error of the coefficient 'b', Sc,  
 327 Standard error of the coefficient 'c'

328
